# Supplementary material for: Descriptive network analysis of Ontario, Canada equine competitions: Implications for disease control
Source: Research Square preprint supplement (doi:10.21203/rs.3.rs-6804927/v1), 2025-07-25
Supplement: Supplementary file 1 [file 016fa3d5e91cc97b8740ea5c.docx]

**Table S1:** Network and node metrics for level-specific subnetworks of the 2017 Equestrian Canada competition contact networks in Ontario.

|  | Bronze | Silver | Gold | Platinum |
| --- | --- | --- | --- | --- |
| Nodes (n) | 70 | 109 | 58 | 13 |
| Edges | 486 | 939 | 619 | 57 |
| Density | 10.1% | 8.0% | 18.7% | 36.5% |
| Standardized Indegree* | 0.07 (0.03 - 0.1) | 0.06 (0.03 - 0.1) | 0.2 (0.07 - 0.3) | 0.3 (0.2 – 0.5) |
| Standardized Outdegree* | 0.09 (0.04 - 0.1) | 0.07 (0.04 - 0.1) | 0.1 (0.08 - 0.3) | 0.3 (0.08 – 0.5) |
| Edge Weight*,** | 3 (1 - 11) | 4 (1- 34) | 10 (2 – 95.5) | 182 (119 - 253) |
| Clusters | 6 | 8 | 4 | 2 |
| Modularity | 0.74 | 0.64 | 0.13 | 0.01 |

*Results presented as median (Interquartile range)

** Edge weight = the number of horses co-attending both competitions

**Table S2:** Network and node metrics for level-specific subnetworks of the 2016 Equestrian Canada competition contact networks in Ontario.

|  | Bronze | Silver | Gold | Platinum |
| --- | --- | --- | --- | --- |
| Nodes (n) | 69 | 115 | 61 | 17 |
| Edges | 580 | 1145 | 674 | 108 |
| Density | 12.4% | 8.7% | 18.4% | 39.7% |
| Standardized Indegree* | 0.09 (0.04 - 0.2) | 0.07 (0.03 - 0.1) | 0.2 (0.07 - 0.3) | 0.4 (0.2 – 0.6) |
| Standardized Outdegree* | 0.1 (0.06 - 0.2) | 0.08 (0.04 - 0.1) | 0.2 (0.07 - 0.3) | 0.4 (0.2 – 0.5) |
| Edge Weight*,** | 3 (1 - 19) | 5 (1- 44) | 8 (1 – 42) | 150 (138 - 275) |
| Clusters | 6 | 8 | 4 | 2 |
| Modularity | 0.73 | 0.69 | 0.14 | 0.01 |

*Results presented as median (Interquartile range)

** Edge weight = the number of horses co-attending both competitions

**Table S3:** Network and node metrics for discipline-specific sub-networks of the 2017 Equestrian Canada competition contact networks in Ontario.

|  | Hunter/Jumper | Dressage | Eventing |
| --- | --- | --- | --- |
| Nodes (n) | 83 | 44 | 23 |
| Edges | 1581 | 290 | 192 |
| Density | 23.0% | 15.3% | 37.9% |
| Standardized Indegree* | 0.1 (0.07 - 0.3) | 0.1 (0.04 - 0.2) | 0.3 (0.2 - 0.5) |
| Standardized Outdegree* | 0.1 (0.1 - 0.3) | 0.2 (0.04 - 0.2) | 0.4 (0.2 - 0.5) |
| Edge Weight*,** | 5 (2 - 40) | 2 (1 - 5) | 6 (2 - 13) |
| Clusters | 7 | 4 | 2 |
| Modularity | 0.48 | 0.5 | 0.16 |

*Results presented as median (Interquartile range)

** Edge weight = the number of horses co-attending both competitions

**Table S4:** Network and node metrics for discipline-specific sub-networks of the 2016 Equestrian Canada competition contact networks in Ontario.

|  | Hunter/Jumper | Dressage | Eventing |
| --- | --- | --- | --- |
| Nodes (n) | 86 | 44 | 20 |
| Edges | 1560 | 382 | 164 |
| Density | 21.3% | 20.0% | 43.0% |
| Standardized Indegree* | 0.2 (0.06 - 0.2) | 0.2 (0.07 - 0.2) | 0.4 (0.2 - 0.6) |
| Standardized Outdegree* | 0.2 (0.1 - 0.3) | 0.2 (0.09 - 0.2) | 0.4 (0.2 - 0.6) |
| Edge Weight*,** | 7 (2 - 53) | 2 (1 - 6) | 9 (4 - 16) |
| Clusters | 9 | 4 | 2 |
| Modularity | 0.5 | 0.48 | 0.2 |

*Results presented as median (Interquartile range)

**Edge weight = the number of horses co-attending both competitions

**Table S5:** Network and node metrics for the 2016-2018 Equestrian Canada monthly contact network of competition venues in Ontario.

|  | March | April | May | June | July | August | September |
| --- | --- | --- | --- | --- | --- | --- | --- |
| 2016:  Median Geodesic*  Giant Strong Component  Giant Weak Component | 1 (1 - 1)  1  1 | 1.2 (1 - 2)  2  3 | 2.0 (1 - 4)  6  15 | 2.2 (1 - 5)  18  25 | 2.1 (1 - 4)  17  29 | 2.2 (1 - 5)  12  21 | 2.2 (1 - 5)  5  10 |
| 2017:  Median Geodesic*  Giant Strong Component  Giant Weak Component | 1 (1 - 1)  1  1 | 1.2 (1 - 3)  2  3 | 1.8 (1 - 3)  3  16 | 2.4 (1 - 6)  17  21 | 2 (1 - 4)  14  30 | 2.3 (1 - 6)  13  21 | 1.1 (1 - 2)  1  6 |
| 2018:  Median Geodesic*  Giant Strong Component  Giant Weak Component | 1 (1 – 1)  1  1 | 1 (1 – 1)  1  2 | 1.5 (1 – 3)  1  16 | 2.8 (1 – 7)  15  21 | 2.3 (1 – 5)  3  29 | 2.1 (1 – 5)  10  20 | 1 (1 – 1)  1  6 |

*Results presented as median (Interquartile range)

**Figure S1:** A flowchart detailing the inclusion, exclusion, and formatting of data for a network analysis of registered Equestrian Canada competitions and show results from 2016 to 2018.
